# Supplementary material
Source: Springer Nature journal article supplement (https://www.springermedizin.de/resource/supplementary/12937_2010_328_MOESM3_ESM.pdf/25653178)

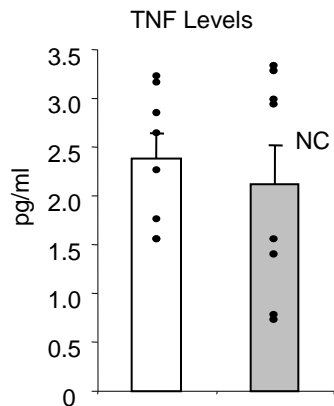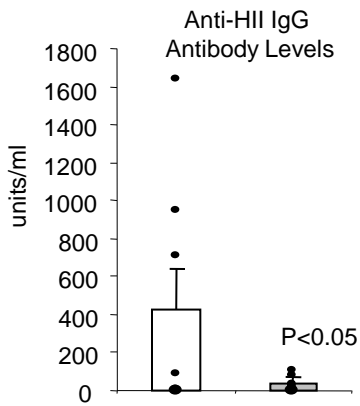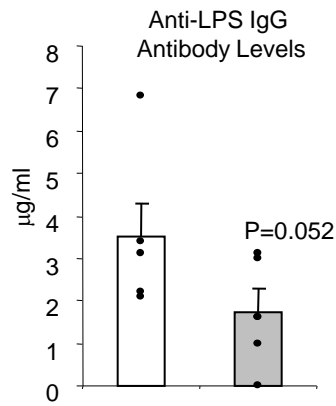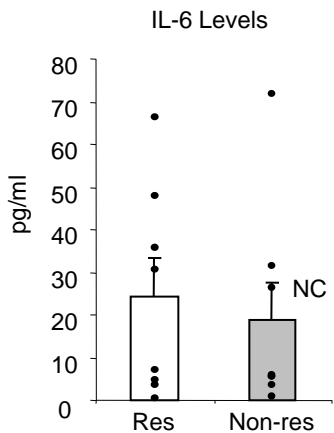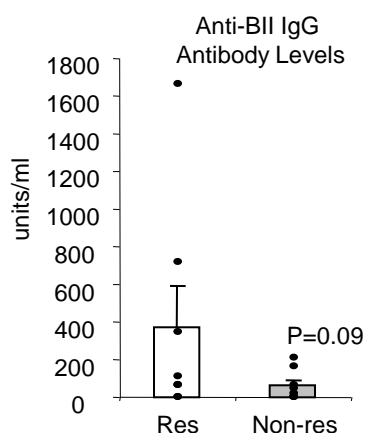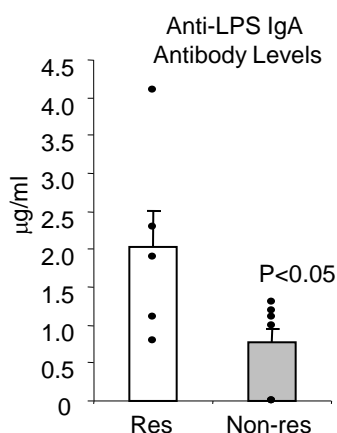

Supplement: MOESM3 [file 25653178]
